# Supplementary material
Source: Springer Nature journal article supplement (https://www.springermedizin.de/resource/supplementary/12879_2009_918_MOESM1_ESM.pdf/9449638)

untitled Display-1

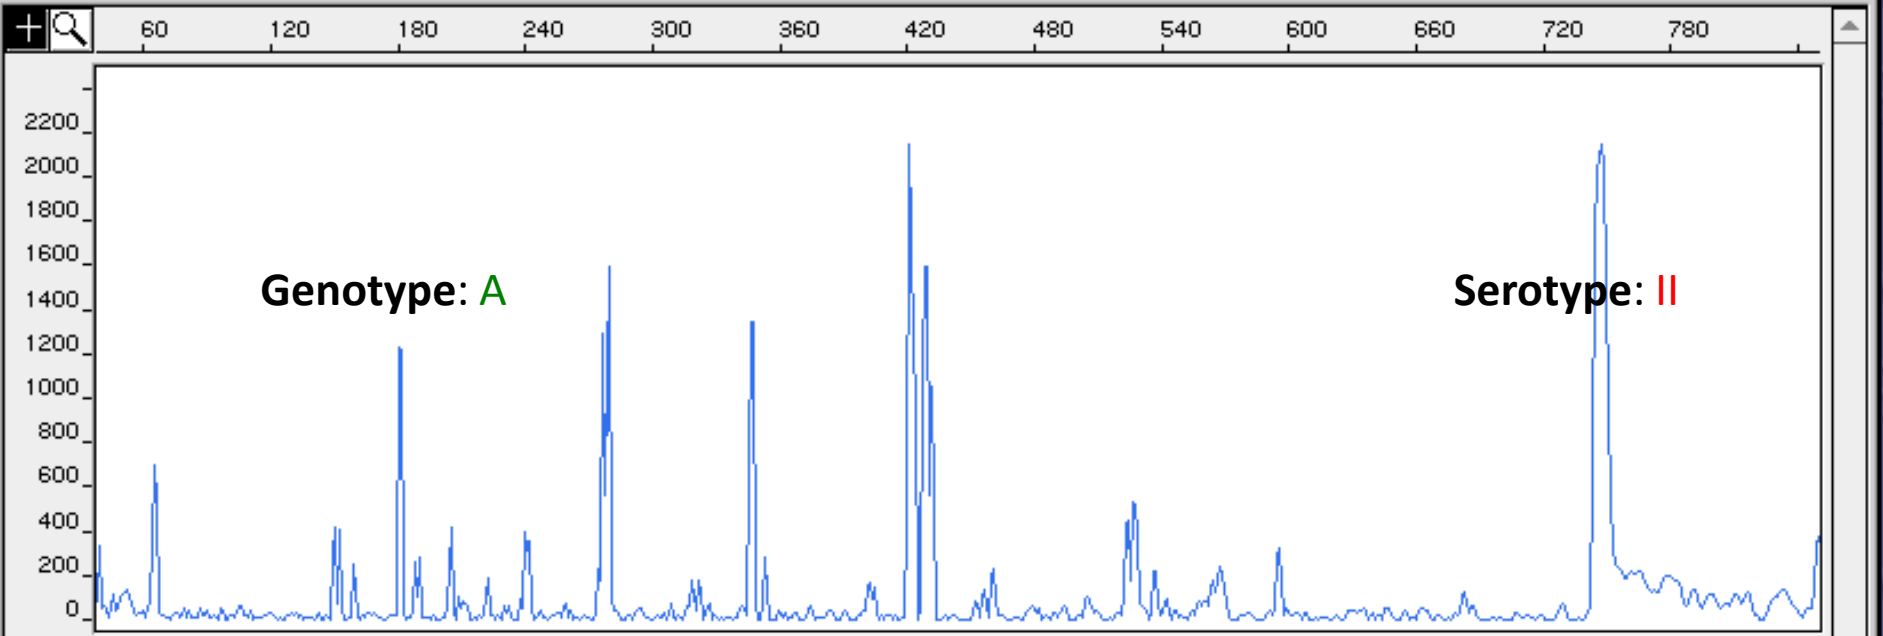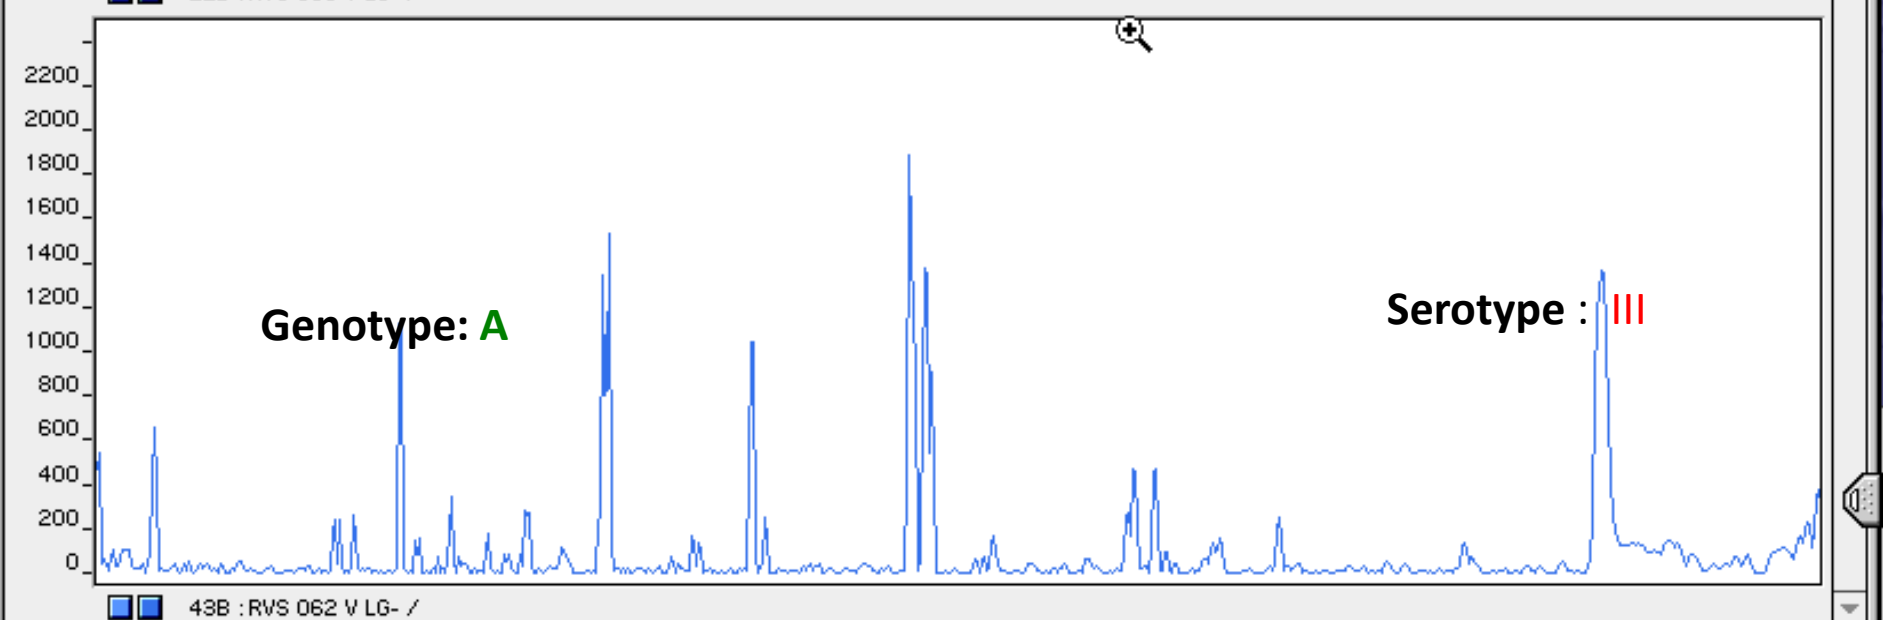

Supplement: MOESM1 [file 9449638]
